# Supplementary material for: Detection of the Invasive Mosquito Species Aedes (Stegomyia) albopictus (Diptera: Culicidae) in Portugal
Source: PubMed Central journal article supplement (PMC5923862; doi:10.3390/ijerph15040820), 2018-04-21
Supplement: ijerph-15-00820-s001.pdf [file ijerph-15-00820-s001.pdf]

**Table S1:** Trap/breeding sites GPS coordinates and positive sites for *Aedes albopictus* mosquitos.

| Number | Trap/Breeding Site | Lat.       | Long.      | <i>Aedes albopictus</i> Presence |
|--------|--------------------|------------|------------|----------------------------------|
| 1      | BG-sentinel        | 41.186416° | -8.327547° | Positive                         |
| 2      | Ovitrap            | 41.186459° | -8.327544° | Negative                         |
| 3      | Ovitrap            | 41.186423° | -8.327443° | Negative                         |
| 4      | Ovitrap            | 41.186424° | -8.327637° | Negative                         |
| 5      | Ovitrap            | 41.186294° | -8.327605° | Negative                         |
| 6      | Ovitrap            | 41.186552° | -8.327650° | Negative                         |
| 7      | Ovitrap            | 41.186600° | -8.327725° | Negative                         |
| 8      | Ovitrap            | 41.186276° | -8.327988° | Positive                         |
| 9      | Ovitrap            | 41.185875° | -8.328336° | Negative                         |
| 10     | Ovitrap            | 41.186123° | -8.328778° | Negative                         |
| 11     | BG-sentinel        | 41.186144° | -8.328674° | Positive                         |
| 12     | Ovitrap            | 41.186383° | -8.329040° | Negative                         |
| 13     | Ovitrap            | 41.186356° | -8.329872° | Negative                         |
| 14     | Ovitrap            | 41.186792° | -8.329498° | Negative                         |
| 15     | Ovitrap            | 41.186425° | -8.328485° | Negative                         |
| 16     | Ovitrap            | 41.185582° | -8.328519° | Positive                         |
| 17     | BG-sentinel        | 41.185603° | -8.328540° | Negative                         |
| 18     | Ovitrap            | 41.185791° | -8.328681° | Positive                         |
| 19     | Ovitrap            | 41.185169° | -8.329153° | Negative                         |
| 20     | Ovitrap            | 41.185124° | -8.328799° | Negative                         |
| 21     | Ovitrap            | 41.185781° | -8.329159° | Positive                         |
| 22     | BG-sentinel        | 41.185800° | -8.329204° | Negative                         |
| 23     | BG-sentinel        | 41.185986° | -8.329737° | Negative                         |
| 24     | Ovitrap            | 41.185940° | -8.329936° | Negative                         |
| 25     | Ovitrap            | 41.186109° | -8.329845° | Positive                         |
| 26     | BG-sentinel        | 41.186096° | -8.329870° | Negative                         |
| 27     | BG-sentinel        | 41.185490° | -8.330146° | Negative                         |
| 28     | Ovitrap            | 41.185353° | -8.330588° | Positive                         |
| 29     | Ovitrap            | 41.185608° | -8.330093° | Negative                         |
| 30     | Ovitrap            | 41.184529° | -8.330670° | Negative                         |
| 31     | Ovitrap            | 41.184170° | -8.330835° | Negative                         |
| 32     | Ovitrap            | 41.183637° | -8.331352° | Negative                         |
| 33     | Ovitrap            | 41.184326° | -8.329629° | Negative                         |
| 34     | Ovitrap            | 41.185002° | -8.329215° | Negative                         |
| 35     | Ovitrap            | 41.186000° | -8.327267° | Negative                         |
| 36     | Ovitrap            | 41.186695° | -8.327505° | Negative                         |
| 37     | Ovitrap            | 41.186863° | -8.327213° | Negative                         |
| 38     | Ovitrap            | 41.186944° | -8.326789° | Negative                         |
| 39     | Ovitrap            | 41.187181° | -8.327640° | Negative                         |
| 40     | Ovitrap            | 41.187272° | -8.328202° | Negative                         |
| 41     | Ovitrap            | 41.187647° | -8.328416° | Negative                         |
| 42     | Ovitrap            | 41.186936° | -8.331514° | Negative                         |
| 43     | Ovitrap            | 41.185443° | -8.331477° | Negative                         |
| 44     | Ovitrap            | 41.184686° | -8.332118° | Negative                         |
| 45     | Ovitrap            | 41.184735° | -8.332702° | Negative                         |
| 46     | Ovitrap            | 41.18335°  | -8.33265°  | Negative                         |
| 47     | Ovitrap            | 41.17938°  | -8.33057°  | Negative                         |
| 48     | Ovitrap            | 41.184110° | -8.324280° | Negative                         |

|    |                     |            |            |          |
|----|---------------------|------------|------------|----------|
| 49 | Ovitrap             | 41.18832°  | -8.32799°  | Negative |
| 50 | Ovitrap             | 41.1886°   | -8.32932°  | Negative |
| 51 | Ovitrap             | 41.18698°  | -8.33208°  | Negative |
| 52 | Ovitrap             | 41.18151°  | -8.3306°   | Negative |
| 53 | Ovitrap             | 41.18426°  | -8.32543°  | Negative |
| 54 | Ovitrap             | 41.18493°  | -8.32735°  | Negative |
| 55 | Ovitrap             | 41.18551°  | -8.3276°   | Negative |
| S1 | Gutter              | 41.186342° | -8.327701° | Positive |
| S2 | Gutter              | 41.186388° | -8.327679° | Negative |
| S3 | Gutter              | 41.186291° | -8.328062° | Positive |
| S4 | Gutter              | 41.186362° | -8.328098° | Positive |
| S5 | Gutter              | 41.186051° | -8.328552° | Positive |
| S6 | Gutter              | 41.186211° | -8.328484° | Negative |
| S7 | Gutter              | 41.185901° | -8.328808° | Negative |
| S8 | Gutter              | 41.185934° | -8.328908° | Negative |
| T1 | Water tank (>1000L) | 41.187067° | -8.331394° | Negative |
| T2 | Water tank (>1000L) | 41.181005° | -8.332791° | Negative |

---
